# Supplementary material for: The genetic characterization of grapevines prospected in old Serbian vineyards reveals multiple relationships between traditional varieties of the Balkans
Source: Frontiers journal article supplement (doi:10.3389/fpls.2024.1391679), 2024-07-11
Supplement: Image_1.PDF [file Image_1.PDF]

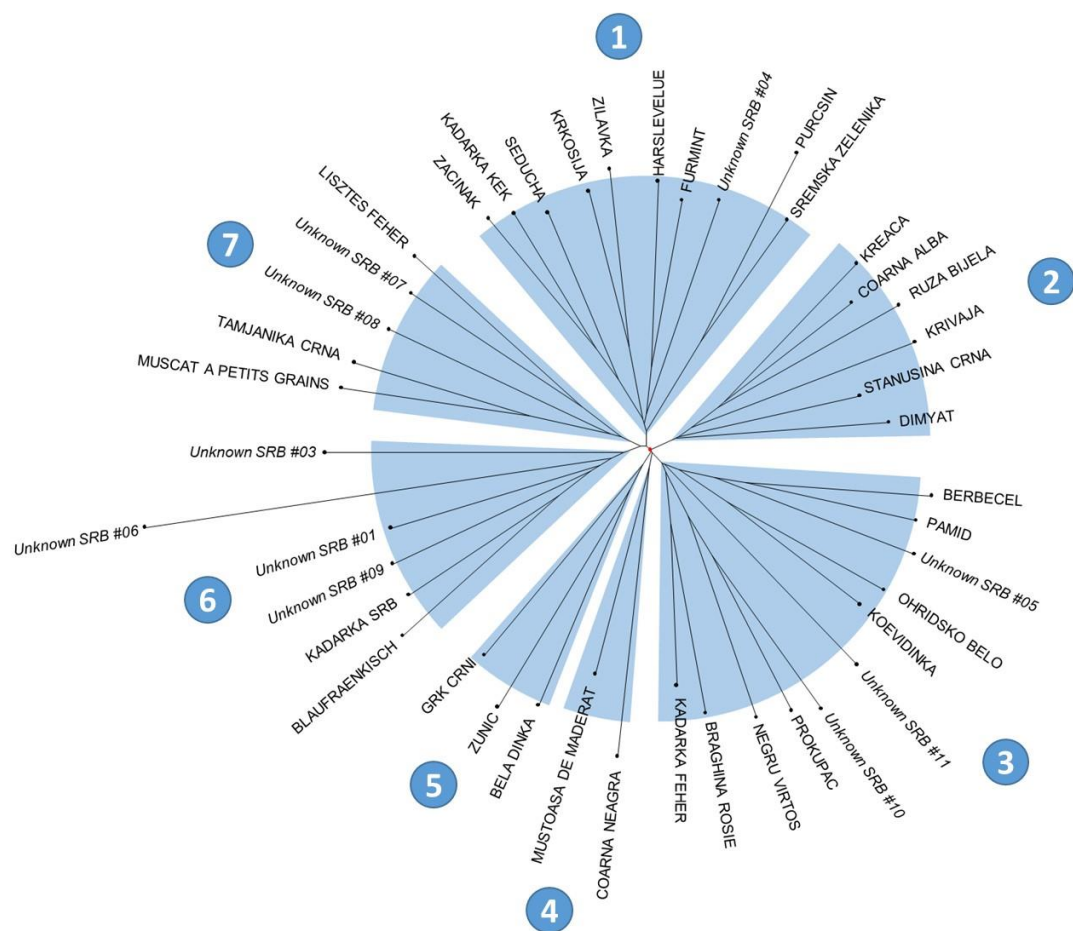

**Supplementary Material 6.** Unweighted Neighbor-Joining (UwNJ) radiation tree obtained between the 43 Balkan varieties identified in this work, based on 240-SNPs. All varieties were divided into seven genetic groups (1-7), indicated in blue.
