# Supplementary material for: The genetic characterization of grapevines prospected in old Serbian vineyards reveals multiple relationships between traditional varieties of the Balkans
Source: Front Plant Sci. 2024 Jul 11;15:1391679. doi: 10.3389/fpls.2024.1391679 (PMC11269227; doi:10.3389/fpls.2024.1391679)
Supplement: Supplementary file 3 [file Table_1.xlsx]

## Sheet: SM1
Supplementary Material 1. List of the 138 grapevine samples included in this study. For each sample, we indicate its local name and sampling site (origin). Variety name, variety number (according to the VIVC database), main use, and putative region/country of origin is indicated when available.
Sample: Code	Sample: Name	Sample: Origin	Berry color	ICVV Genotype Number	VIVC Number	Variety Name	Identification: comments	Main use	Region/Country of origin
ICVV_23673	SRB137 - Agadaj	Vojvodina	-	GEN_DNA_0749	95	AGADAI	Synonym	Wine; Table	DAGHESTAN
ICVV_23664	SRB128 - Bekator beli	Vojvodina	-	GEN_DNA_3779	904	BAKATOR BELYI	Misprint	Wine	SUN (FORMERLY USSR)
ICVV_23665	SRB129 - Bela dinka	Vojvodina	-	GEN_DNA_1462	16848	BELA DINKA	Prime name	Wine	SERBIA
ICVV_23557	SRB017 - Zelenik	South Serbia	Green - Yellow	GEN_DNA_1415	1148	BERBECEL	Misnomer (Zelenika, VIVC: 27108)	Wine	BULGARIA
ICVV_23666	SRB130 - Sura lisicina	Vojvodina	-	GEN_DNA_1244	1459	BLAUFRAENKISCH	Synonym	Wine; Table	AUSTRIA
ICVV_23601	SRB063 - Bagrina 1	East Serbia	Rose	GEN_DNA_1072	1644	BRAGHINA ROSIE	Synonym	Wine; Table	SERBIA
ICVV_23602	SRB064 - Bagrina 2	East Serbia	Rose	GEN_DNA_1072	1644	BRAGHINA ROSIE	Synonym	Wine; Table	SERBIA
ICVV_23613	SRB075 - Bagrina 4	East Serbia	Rose	GEN_DNA_1072	1644	BRAGHINA ROSIE	Synonym	Wine; Table	SERBIA
ICVV_23615	SRB077 - Bagrina 6	East Serbia	Rose	GEN_DNA_1072	1644	BRAGHINA ROSIE	Synonym	Wine; Table	SERBIA
ICVV_23616	SRB078 - Bagrina 7	East Serbia	Rose	GEN_DNA_1072	1644	BRAGHINA ROSIE	Synonym	Wine; Table	SERBIA
ICVV_23618	SRB080 - Bagrina 9	East Serbia	Rose	GEN_DNA_1072	1644	BRAGHINA ROSIE	Synonym	Wine; Table	SERBIA
ICVV_23619	SRB081 - Bagrina 10	East Serbia	Rose	GEN_DNA_1072	1644	BRAGHINA ROSIE	Synonym	Wine; Table	SERBIA
ICVV_23645	SRB109 - Bagrina 11	East Serbia	Rose	GEN_DNA_1072	1644	BRAGHINA ROSIE	Synonym	Wine; Table	SERBIA
ICVV_23646	SRB110 - Bagrina 12	East Serbia	Rose	GEN_DNA_1072	1644	BRAGHINA ROSIE	Synonym	Wine; Table	SERBIA
ICVV_23647	SRB111 - Bagrina 13	East Serbia	Rose	GEN_DNA_1072	1644	BRAGHINA ROSIE	Synonym	Wine; Table	SERBIA
ICVV_23648	SRB112 - Bagrina 14	East Serbia	Rose	GEN_DNA_1072	1644	BRAGHINA ROSIE	Synonym	Wine; Table	SERBIA
ICVV_23649	SRB113 - Bagrina 15	East Serbia	Rose	GEN_DNA_1072	1644	BRAGHINA ROSIE	Synonym	Wine; Table	SERBIA
ICVV_23650	SRB114 - Bagrina 16	East Serbia	Rose	GEN_DNA_1072	1644	BRAGHINA ROSIE	Synonym	Wine; Table	SERBIA
ICVV_23651	SRB115 - Bagrina 17	East Serbia	Rose	GEN_DNA_1072	1644	BRAGHINA ROSIE	Synonym	Wine; Table	SERBIA
ICVV_23652	SRB116 - Bagrina 12	East Serbia	Rose	GEN_DNA_1072	1644	BRAGHINA ROSIE	Synonym	Wine; Table	SERBIA
ICVV_23634	SRB098 - Adakalka	Central Serbia	Green - Yellow	GEN_DNA_1062	10196	CHAOUCH BLANC	Misnomer (Adakalka, VIVC: 66)	Table	TURKEY
ICVV_23687	SRB151 - Plemenka kraljevska	Vojvodina	-	GEN_DNA_2055	2473	CHASSELAS	Sport color (Chasselas Rose)	Wine; Table	France
ICVV_23637	SRB101 - Smederevka 4	Central Serbia	Green - Yellow	GEN_DNA_2510	2724	COARNA ALBA	Misnomer (Smederevka, VIVC: 42351)	Wine; Table	MOLDOVA
ICVV_23679	SRB143 - Drenak beli	Vojvodina	-	GEN_DNA_2510	2724	COARNA ALBA	Misnomer (Drenak Beli, VIVC: 16564)	Wine; Table	MOLDOVA
ICVV_23680	SRB144 - Bele kozije sise	Vojvodina	-	GEN_DNA_2510	2724	COARNA ALBA	Synonym	Wine; Table	MOLDOVA
ICVV_23675	SRB139 - Drenak crni	Vojvodina	-	GEN_DNA_2052	2726	COARNA NEAGRA	Misnomer (Drenak Crni, VIVC: 25321)	Wine; Table	MOLDOVA
ICVV_23561	SRB021 - Ilijsko rano	South Serbia	Green - Yellow	GEN_DNA_2019	9166	CSABA GYOENGYE	New synonym	Wine; Table	HUNGARY
ICVV_23543	SRB003 - Smederevka	South Serbia	Green - Yellow	GEN_DNA_0653	5716	DIMYAT	Synonym	Wine; Table	BULGARIA
ICVV_23623	SRB086 - Smederevka zelena	East Serbia	Green - Yellow	GEN_DNA_0653	5716	DIMYAT	Synonym	Wine; Table	BULGARIA
ICVV_23624	SRB087 - Smederevka zuta	East Serbia	Green - Yellow	GEN_DNA_0653	5716	DIMYAT	Synonym	Wine; Table	BULGARIA
ICVV_23636	SRB100 - Smederevka 3	Central Serbia	Green - Yellow	GEN_DNA_0653	5716	DIMYAT	Synonym	Wine; Table	BULGARIA
ICVV_23672	SRB136 - Smederevka	Vojvodina	-	GEN_DNA_0653	5716	DIMYAT	Synonym	Wine; Table	BULGARIA
ICVV_23658	SRB122 - Ezerjo	Vojvodina	-	GEN_DNA_0142	4027	EZERJO	Prime name	Wine	HUNGARY
ICVV_23549	SRB009 - Jagoda	South Serbia	Green - Yellow	GEN_DNA_9079	4088	FERDINAND DE LESSEPS	New synonym	Wine; Table	UNITED KINGDOM
ICVV_23558	SRB018 - Jagoda 1	South Serbia	Green - Yellow	GEN_DNA_9079	4088	FERDINAND DE LESSEPS	New synonym	Wine; Table	UNITED KINGDOM
ICVV_23560	SRB020 - Jagoda 2	South Serbia	Green - Yellow	GEN_DNA_9079	4088	FERDINAND DE LESSEPS	New synonym	Wine; Table	UNITED KINGDOM
ICVV_23564	SRB024 - Jagoda	South Serbia	Green - Yellow	GEN_DNA_9079	4088	FERDINAND DE LESSEPS	New synonym	Wine; Table	UNITED KINGDOM
ICVV_23568	SRB030 - ???	South Serbia	Green - Yellow	GEN_DNA_0689	4292	FURMINT	-	Wine	HUNGARY
ICVV_23660	SRB124 - Gavran	Vojvodina	-	GEN_DNA_3780	5067	GRK CRNI	Synonym		SERBIA
ICVV_23684	SRB148 - Harslevelue-Lipolist	Vojvodina	-	GEN_DNA_1247	5314	HARSLEVELUE	-	Wine; Table	HUNGARY
ICVV_23668	SRB132 - Kadarka bela	Vojvodina	-	GEN_DNA_3792	5899	KADARKA FEHER	Synonym	Wine	HUNGARY
ICVV_23698	SRB162 - M1 Kadarka	Vojvodina	-	GEN_DNA_0351	5898	KADARKA KEK	Synonym	Wine	HUNGARY
ICVV_23661	SRB125 - Kadarka	Vojvodina	-	GEN_DNA_3761	24623	KADARKA SRB	Prime name		SERBIA
ICVV_23659	SRB123 - Furmint	Vojvodina	-	GEN_DNA_3791	6312	KNIPPERLE	Misnomer (Furmint, VIVC: 4292)	Wine	FRANCE
ICVV_23686	SRB150 - Ruzica mirisava	Vojvodina	-	GEN_DNA_2568	13727	KOEVIDINKA	Synonym; Misprint	Wine	HUNGARY
ICVV_23670	SRB134 - Kokur beli	Vojvodina	-	GEN_DNA_2343	6375	KOKUR BELYI	Synonym	Wine; Table	UKRAINE
ICVV_23677	SRB141 - Kreaca	Vojvodina	-	GEN_DNA_3783	6501	KREACA	Prime name	Wine; Table	SERBIA
ICVV_23683	SRB147 - Krivalja	Vojvodina	-	GEN_DNA_3784	24929	KRIVAJA	Misnomer (Krivalja Bijela, VIVC: 10050; Krivalja Crvena, VIVC: 6509)	Table	SERBIA
ICVV_23667	SRB131 - Krkosija supljica	Vojvodina	-	GEN_DNA_2771	16850	KRKOSIJA	Synonym	Wine	SERBIA
ICVV_23663	SRB127 - Beli medenac	Vojvodina	-	GEN_DNA_3366	17061	LISZTES FEHER	Misnomer (Beli Medenac, VIVC: 5417)	Wine	HUNGARY
ICVV_23562	SRB022 - Tamjanika bela	South Serbia	Green - Yellow	GEN_DNA_1341	8056	MOSCATO GIALLO	Misnomer (Tamjanika Bela, VIVC: 12246)	Wine	ITALY
ICVV_23593	SRB055 - Tamjanika cilibarka	South Serbia (Prokuplje vine district)	Green - Yellow	GEN_DNA_1341	8056	MOSCATO GIALLO	Misnomer	Wine	ITALY
ICVV_23676	SRB140 - Tamjanika crvena	Vojvodina	Green - Yellow	GEN_DNA_1341	8056	MOSCATO GIALLO	Misnomer (Tamjanika Crvena, VIVC: 15935)	Wine	ITALY
ICVV_23559	SRB019 - Tamjanika dedina	South Serbia	Green - Yellow	GEN_DNA_2234	8193	MUSCAT A PETITS GRAINS	-	Wine; Table	GREECE
ICVV_23594	SRB056 - Tamjanika cilibarka	South Serbia (Prokuplje vine district)	Green - Yellow	GEN_DNA_2234	8193	MUSCAT A PETITS GRAINS	New synonym	Wine; Table	GREECE
ICVV_23595	SRB057 - Tamjanika cilibarka	South Serbia (Prokuplje vine district)	Green - Yellow	GEN_DNA_2234	8193	MUSCAT A PETITS GRAINS	New synonym	Wine; Table	GREECE
ICVV_23596	SRB058 - Tamjanika cilibarka	South Serbia (Zupa vine district)	Green - Yellow	GEN_DNA_2234	8193	MUSCAT A PETITS GRAINS	New synonym	Wine; Table	GREECE
ICVV_23597	SRB059 - Tamjanika cilibarka	South Serbia (Zupa vine district)	Green - Yellow	GEN_DNA_2234	8193	MUSCAT A PETITS GRAINS	New synonym	Wine; Table	GREECE
ICVV_23598	SRB060 - Tamjanika cilibarka	South Serbia (Zupa vine district)	Green - Yellow	GEN_DNA_2234	8193	MUSCAT A PETITS GRAINS	New synonym	Wine; Table	GREECE
ICVV_23662	SRB126 - Muskat krokan	Vojvodina	-	GEN_DNA_0799	8221	MUSCAT FLEUR D'ORANGER	Synonym	Wine; Table	FRANCE
ICVV_23700	SRB164 - no name	Vojvodina	-	GEN_DNA_3793	8311	MUSTOASA DE MADERAT	-	Wine	BALKAN
ICVV_23556	SRB016 - Osipac crveni	South Serbia	Blue - Black	GEN_DNA_1041	8466	NEGRU VIRTOS	New synonym	Wine	ROMANIA
ICVV_23622	SRB084 - Belina 3	East Serbia	Green - Yellow	GEN_DNA_3775	21403	OHRIDSKO BELO	Misnomer (Belina, Prokupac: 9734)		REPUBLIC OF NORTHMACEDONIA
ICVV_23544	SRB004 - Drenak roze	South Serbia	Rose	GEN_DNA_1218	8899	PAMID	Synonym; Misprint	Wine	BULGARIA
ICVV_23546	SRB006 - Drenak crveni	South Serbia	Rose	GEN_DNA_1218	8899	PAMID	Synonym; Misprint	Wine	BULGARIA
ICVV_23553	SRB013 - Kadarka	South Serbia	Rose	GEN_DNA_1218	8899	PAMID	Misnomer (Kadarka Kek, VIVC: 5898; Olasz Kadarka: 8738)	Wine	BULGARIA
ICVV_23566	SRB028 - Crna plovdina	South Serbia	Rose	GEN_DNA_1218	8899	PAMID	Synonym; Misprint	Wine	BULGARIA
ICVV_23599	SRB061 - Tamjanika crna/Plovdina Mile	South Serbia (Prokuplje vine district)	-	GEN_DNA_1218	8899	PAMID	Synonym; Misprint	Wine	BULGARIA
ICVV_23604	SRB066 - Plovdina 1	East Serbia	Rose	GEN_DNA_1218	8899	PAMID	Synonym; Misprint	Wine	BULGARIA
ICVV_23605	SRB067 - Plovdina 2	East Serbia	Rose	GEN_DNA_1218	8899	PAMID	Synonym; Misprint	Wine	BULGARIA
ICVV_23614	SRB076 - Bagrina 5	East Serbia	Rose	GEN_DNA_1218	8899	PAMID	Misnomer (Bagrina, VIVC: 1644)	Wine	BULGARIA
ICVV_23617	SRB079 - Bagrina 8	East Serbia	Rose	GEN_DNA_1218	8899	PAMID	Misnomer (Bagrina, VIVC: 1644)	Wine	BULGARIA
ICVV_23625	SRB088 - Prokupac 3	East Serbia	Blue - Black	GEN_DNA_1218	8899	PAMID	Misnomer (Belina, VIVC: 41891)	Wine	BULGARIA
ICVV_23626	SRB089 - Plovdina 3 svetla	East Serbia	Rose	GEN_DNA_1218	8899	PAMID	Synonym	Wine	BULGARIA
ICVV_23627	SRB090 - Plovdina 4 tamna	East Serbia	Rose	GEN_DNA_1218	8899	PAMID	Synonym	Wine	BULGARIA
ICVV_23629	SRB092 - Cetereska 1	East Serbia	-	GEN_DNA_1218	8899	PAMID	Misnomer (Cetereska, VIVC: 5898)	Wine	BULGARIA
ICVV_23630	SRB093 - Cetereska 2	East Serbia	-	GEN_DNA_1218	8899	PAMID	Misnomer (Cetereska, VIVC: 5898)	Wine	BULGARIA
ICVV_23638	SRB102 - Plovdina 5-Lisicina	Central Serbia	Rose	GEN_DNA_1218	8899	PAMID	Synonym	Wine	BULGARIA
ICVV_23639	SRB103 - Plovdina 6-Lisicina	Central Serbia	Rose	GEN_DNA_1218	8899	PAMID	Synonym	Wine	BULGARIA
ICVV_23643	SRB107 - Nepoznato 2	Central Serbia	Rose	GEN_DNA_1218	8899	PAMID	-	Wine	BULGARIA
ICVV_23654	SRB118 - Slankamenka crvena	Vojvodina	-	GEN_DNA_1218	8899	PAMID	Synonym	Wine	BULGARIA
ICVV_23688	SRB152 - R1 Ruzica	Vojvodina	-	GEN_DNA_1218	8899	PAMID	New synonym	Wine	BULGARIA
ICVV_23689	SRB153 - R2 Ruzica	Vojvodina	-	GEN_DNA_1218	8899	PAMID	New synonym	Wine	BULGARIA
ICVV_23690	SRB154 - R3 Ruzica	Vojvodina	-	GEN_DNA_1218	8899	PAMID	New synonym	Wine	BULGARIA
ICVV_23691	SRB155 - R4 ?	Vojvodina	-	GEN_DNA_1218	8899	PAMID	-	Wine	BULGARIA
ICVV_23692	SRB156 - R5 ?	Vojvodina	-	GEN_DNA_1218	8899	PAMID	-	Wine	BULGARIA
ICVV_23693	SRB157 - R6 Ruzica	Vojvodina	-	GEN_DNA_1218	8899	PAMID	New synonym	Wine	BULGARIA
ICVV_23694	SRB158 - R7 Ruzica	Vojvodina	-	GEN_DNA_1218	8899	PAMID	New synonym	Wine	BULGARIA
ICVV_23695	SRB159 - R8 ?	Vojvodina	-	GEN_DNA_1218	8899	PAMID	-	Wine	BULGARIA
ICVV_23696	SRB160 - R9 ?	Vojvodina	-	GEN_DNA_1218	8899	PAMID	-	Wine	BULGARIA
ICVV_23697	SRB161 - R10 Ruzica	Vojvodina	-	GEN_DNA_1218	8899	PAMID	New synonym	Wine	BULGARIA
ICVV_23703	SRB167 - Slankamenka uzgoj uz pritku	Vojvodina	-	GEN_DNA_1218	8899	PAMID	Synonym; Misprint	Wine	BULGARIA
ICVV_23635	SRB099 - Drenak	Central Serbia	Rose	GEN_DNA_0883	8945	PARMAK CERVEN	Synonym	Table	TURKEY
ICVV_23704	SRB168 - Prokupac na OZP	Vojvodina	-	GEN_DNA_2107	9279	PINOT	Misnomer (Prokupac, VIVC: 9734)	Wine	FRANCE
ICVV_23550	SRB010 - Prokupac	South Serbia	Blue - Black	GEN_DNA_0916	9734	PROKUPAC	Prime name	Wine	SERBIA
ICVV_23552	SRB012 - Prokupac	South Serbia	Blue - Black	GEN_DNA_0916	9734	PROKUPAC	Prime name	Wine	SERBIA
ICVV_23555	SRB015 - Osipac plavi	South Serbia	Blue - Black	GEN_DNA_0916	9734	PROKUPAC	New synonym	Wine	SERBIA
ICVV_23606	SRB068 - Prokupac 1	East Serbia	Blue - Black	GEN_DNA_0916	9734	PROKUPAC	Prime name	Wine	SERBIA
ICVV_23620	SRB082 - Prokupac 2	East Serbia	Blue - Black	GEN_DNA_0916	9734	PROKUPAC	Prime name	Wine	SERBIA
ICVV_23641	SRB105 - Prokupac 5	Central Serbia	Blue - Black	GEN_DNA_0916	9734	PROKUPAC	Prime name	Wine	SERBIA
ICVV_23642	SRB106 - Prokupac 6	Central Serbia	Blue - Black	GEN_DNA_0916	9734	PROKUPAC	Prime name	Wine	SERBIA
ICVV_23631	SRB095 - Gak	Central Serbia	Blue - Black	GEN_DNA_4547	9822	PURCSIN	Misnomer (Gak, VIVC: 5067)	Wine; Table	HUNGARY
ICVV_23548	SRB008 - Belina 2	South Serbia	Green - Yellow	GEN_DNA_4548	10419	RUZA BIJELA	Misnomer (Belina, VIVC: 41891)	Wine	CROATIA
ICVV_23551	SRB011 - Belina 3	South Serbia	Green - Yellow	GEN_DNA_4548	10419	RUZA BIJELA	Misnomer (Belina, VIVC: 41891)	Wine	CROATIA
ICVV_23563	SRB023 - Ranka bela	South Serbia	Green - Yellow	GEN_DNA_4548	10419	RUZA BIJELA	New synonym	Wine	CROATIA
ICVV_23567	SRB029 - Ranka bela	South Serbia	Green - Yellow	GEN_DNA_4548	10419	RUZA BIJELA	New synonym	Wine	CROATIA
ICVV_23607	SRB069 - Belina 2	East Serbia	Green - Yellow	GEN_DNA_4548	10419	RUZA BIJELA	Misnomer (Belina, VIVC: 41891)	Wine	CROATIA
ICVV_23682	SRB146 - Sedusa	Vojvodina	-	GEN_DNA_4549	10855	SEDUCHA	Synonym	Wine	SERBIA
ICVV_23542	SRB002 - Belo Semion?	South Serbia	Green - Yellow	GEN_DNA_2185	11480	SEMILLON	Misprint	Wine	FRANCE
ICVV_23656	SRB120 - Sremska zelenika	Vojvodina	-	GEN_DNA_3787	15934	SREMSKA ZELENIKA	Prime name	Wine	BALKAN
ICVV_23699	SRB163 - M5 Sremska zelenika	Vojvodina	-	GEN_DNA_3787	15934	SREMSKA ZELENIKA	Prime name	Wine	BALKAN
ICVV_23701	SRB165 - M6 Sremska zelenika	Vojvodina	-	GEN_DNA_3787	15934	SREMSKA ZELENIKA	Prime name	Wine	BALKAN
ICVV_23669	SRB133 - Stanušina	Vojvodina	-	GEN_DNA_3770	11994	STANUSINA CRNA	Synonym	Wine	REPUBLIC OF NORTHMACEDONIA
ICVV_23541	SRB001 - Tamjanika crna	South Serbia	Blue - Black	GEN_DNA_1446	8057	TAMJANIKA CRNA	Prime name	Wine; Table	BALKAN
ICVV_23600	SRB062 - Tamjanika Crna	South Serbia (Prokuplje vine district)	Blue - Black	GEN_DNA_1446	8057	TAMJANIKA CRNA	Prime name	Wine; Table	BALKAN
ICVV_23609	SRB071 - Tamjanika crna 1	East Serbia	Blue - Black	GEN_DNA_1446	8057	TAMJANIKA CRNA	Prime name	Wine; Table	BALKAN
ICVV_23610	SRB072 - Tamjanika crna 2	East Serbia	Blue - Black	GEN_DNA_1446	8057	TAMJANIKA CRNA	Prime name	Wine; Table	BALKAN
ICVV_23611	SRB073 - Tamjanika crna 3	East Serbia	Blue - Black	GEN_DNA_1446	8057	TAMJANIKA CRNA	Prime name	Wine; Table	BALKAN
ICVV_23657	SRB121 - Tamjanika crna	Vojvodina	-	GEN_DNA_1446	8057	TAMJANIKA CRNA	Prime name	Wine; Table	BALKAN
ICVV_23545	SRB005 - Drenak nezno roze	South Serbia	Rose	GEN_DNA_4542	-	Unknown SRB #01	-	-	-
ICVV_23633	SRB097 - Caus	Central Serbia	Rose	GEN_DNA_4542	-	Unknown SRB #01	-	-	-
ICVV_23608	SRB070 - Bagrina 3	East Serbia	Rose	GEN_DNA_4543	-	Unknown SRB #03	-	-	-
ICVV_23632	SRB096 - Nepoznato 1	Central Serbia	Rose	GEN_DNA_4544	-	Unknown SRB #04	-	-	-
ICVV_23640	SRB104 - Plovdina 7-Lisicina	Central Serbia	Rose	GEN_DNA_4545	-	Unknown SRB #05	-	-	-
ICVV_23653	SRB117 - no name	West Serbia (Medieval Monastery Raca)	-	GEN_DNA_4546	-	Unknown SRB #06	-	-	-
ICVV_23655	SRB119 - Bagrina	Vojvodina	-	GEN_DNA_3778	-	Unknown SRB #07	Matches with a previous sample named "Bagrina SRB"	-	-
ICVV_23674	SRB138 - Kavcina	Vojvodina	-	GEN_DNA_3782	-	Unknown SRB #08	-	-	-
ICVV_23678	SRB142 - Plovdina crna	Vojvodina	-	GEN_DNA_3789	-	Unknown SRB #09	Matches with a previous sample named "Plovdina Crna SRB"	-	-
ICVV_23681	SRB145 - Prokupac	Vojvodina	-	GEN_DNA_3786	-	Unknown SRB #10	Matches with a previous sample named "Prokupac SRB"	-	-
ICVV_23685	SRB149 - Ruzica mirisava	Vojvodina	-	GEN_DNA_3794	-	Unknown SRB #11	Matches with a previous sample named "Ružica Mirisava SRB"	-	-
ICVV_23565	SRB025 - Belo kasno	South Serbia	Green - Yellow	GEN_DNA_7449	13081	VILLARD BLANC	Misnomer	Wine	FRANCE
ICVV_23612	SRB074 - Zacinjak 1	East Serbia	Blue - Black	GEN_DNA_4550	13400	ZACINAK	Synonym	Wine	SERBIA
ICVV_23621	SRB083 - Zacinjak 2	East Serbia	Blue - Black	GEN_DNA_4550	13400	ZACINAK	Synonym	Wine	SERBIA
ICVV_23628	SRB091 - Zacinjak 3	East Serbia	Blue - Black	GEN_DNA_4550	13400	ZACINAK	Synonym	Wine	SERBIA
ICVV_23644	SRB108 - Cetereska 3	East Serbia	Blue - Black	GEN_DNA_4550	13400	ZACINAK	Synonym	Wine	SERBIA
ICVV_23547	SRB007 - Belina 1	South Serbia	Green - Yellow	GEN_DNA_2338	13446	ZILAVKA	Misnomer (Belina, VIVC: 41891)	Wine	BOSNIA AND HERZEGOVINA
ICVV_23671	SRB135 - Zunic	Vojvodina	-	GEN_DNA_3788	15923	ZUNIC	Prime name	Wine
ICVV_23554	SRB014 - Belina	South Serbia	Green - Yellow	GEN_DNA_3258	13480	ZUPLJANKA	Misnomer (Belina, VIVC: 41891)	Wine	SERBIA
