# Supplementary material for: The genetic characterization of grapevines prospected in old Serbian vineyards reveals multiple relationships between traditional varieties of the Balkans
Source: Front Plant Sci. 2024 Jul 11;15:1391679. doi: 10.3389/fpls.2024.1391679 (PMC11269227; doi:10.3389/fpls.2024.1391679)
Supplement: Supplementary file 4 [file Table_2.xlsx]

## Sheet: SM2
Supplementary Material 2. List of the 90 grapevine varieties from three winemaking regions used for phylogenetic analyses. DAPC loadings on factor 1 (F1) and factor 2 (F2), and DAPC cluster assignment is also indicated.
Region	Variety Name	ICVV Genotype Number	VIVC Number	DAPC loading F1	DAPC loading F2	DAPC cluster
Caucasus	ALEXANDROOULI	GEN_DNA_2867	263	2.86304	-4.77882	2
Caucasus	ANGUR KALAN	GEN_DNA_0615	8561	2.42834	-4.61925	2
Caucasus	ARAKSENI CHERNYI	GEN_DNA_1417	530	0.676084	-4.94976	2
Caucasus	ARENI SEV	GEN_DNA_3834	576	1.32009	-5.53034	2
Caucasus	ARENI SPITAK	GEN_DNA_3933	577	1.51951	-5.41114	2
Caucasus	AREVIK SPITAK	GEN_DNA_2865	583	-0.0140485	-3.76428	2
Caucasus	ASYL KARA	GEN_DNA_2869	731	3.86743	-4.77414	2
Caucasus	BAYAN SHIREI	GEN_DNA_3326	1049	1.17357	-4.79485	2
Caucasus	CHARENTSI	GEN_DNA_4009	2459	0.919741	-3.70078	2
Caucasus	EGHEGNADZORI SEV	GEN_DNA_4008	26229	1.4515	-4.55151	2
Caucasus	ERASKHENI	GEN_DNA_4010	3924	2.43821	-4.24542	2
Caucasus	ESKERI	GEN_DNA_0204	3960	2.44206	-4.02865	2
Caucasus	HAKOBI VORDI	GEN_DNA_3932	24880	1.176	-4.01366	2
Caucasus	HAYRENIQ	GEN_DNA_4012	16453	2.91683	-5.00123	2
Caucasus	KAKHET	GEN_DNA_3835	5895	2.08838	-3.34903	2
Caucasus	KHARDJI SEV	GEN_DNA_4017	25976	3.30159	-5.91761	2
Caucasus	KHATUN KHARDZHI	GEN_DNA_4016	6168	2.29	-4.86827	2
Caucasus	KHINDOGNY	GEN_DNA_2851	6182	0.511542	-3.79255	2
Caucasus	MASIS	GEN_DNA_4024	7470	0.281106	-4.70117	2
Caucasus	MSKHALI	GEN_DNA_3591	8109	1.28181	-4.56292	2
Caucasus	OJALESHI	GEN_DNA_3330	8698	2.30722	-4.09171	2
Caucasus	RKATSITELI	GEN_DNA_0124	10116	1.20505	-3.66045	2
Caucasus	SAPERAVI	GEN_DNA_1004	10708	1.78058	-5.32941	2
Caucasus	TAVKVERI	GEN_DNA_3439	12276	1.83992	-3.84041	2
Caucasus	TOKUN	GEN_DNA_4023	12558	0.6939	-4.91032	2
Caucasus	TOZOT	GEN_DNA_3823	12600	2.31605	-5.89007	2
Caucasus	TSOLIKOURI	GEN_DNA_2886	12710	3.40059	-2.81827	2
Caucasus	VAGHAHAS ARENI	GEN_DNA_3838	25978	1.44052	-3.09138	2
Caucasus	VANKI	GEN_DNA_4013	25977	1.55113	-3.88561	2
Caucasus	VOSKEAT	GEN_DNA_1450	13165	1.48248	-4.44666	2
Central Europe	ABOURIOU	GEN_DNA_1457	34	5.11723	0.727005	4
Central Europe	ARAMON	GEN_DNA_0564	544	2.24976	-0.302361	2
Central Europe	BICANE	GEN_DNA_0847	1341	4.7538	1.88994	4
Central Europe	CABERNET SAUVIGNON	GEN_DNA_0247	1929	5.05605	1.9979	4
Central Europe	CARIGNAN	GEN_DNA_0540	2098	2.30243	1.68056	3
Central Europe	CHARDONNAY	GEN_DNA_2108	2455	3.53877	2.45549	4
Central Europe	CHENIN BLANC	GEN_DNA_0537	2527	4.60448	1.53095	4
Central Europe	CINSAUT	GEN_DNA_1461	2672	5.28225	0.690593	4
Central Europe	CLAIRETTE	GEN_DNA_0808	2695	3.47726	1.65306	4
Central Europe	COT	GEN_DNA_2300	2889	3.98947	0.694718	4
Central Europe	DANUGUE	GEN_DNA_1454	3425	3.09304	0.533189	3
Central Europe	ELBLING WEISS	GEN_DNA_2324	3865	3.10668	1.30494	4
Central Europe	FOLLE BLANCHE	GEN_DNA_1429	4183	3.44306	0.196124	4
Central Europe	GAMAY NOIR	GEN_DNA_2210	4377	4.24589	1.24115	4
Central Europe	GROS VERT BLANC	GEN_DNA_1478	5082	5.00101	0.573143	4
Central Europe	MAGDELEINE NOIR DES CHARENTES	GEN_DNA_3389	22717	4.27498	1.71083	4
Central Europe	MANSENG NOIR	GEN_DNA_1280	7340	4.23008	1.70386	4
Central Europe	MARSANNE	GEN_DNA_0806	7434	4.85002	0.591538	4
Central Europe	MERLOT	GEN_DNA_1353	7657	5.80353	0.715763	4
Central Europe	MESLIER PETIT	GEN_DNA_1092	7675	2.78116	0.735177	4
Central Europe	MONDEUSE NOIRE	GEN_DNA_0759	7921	3.88193	0.967358	4
Central Europe	OLIVETTE BLANCHE	GEN_DNA_2090	8758	3.05777	0.810242	3
Central Europe	ONDENC	GEN_DNA_1481	8770	3.56979	1.45197	4
Central Europe	PINOT	GEN_DNA_2107	9279	6.07496	1.77153	4
Central Europe	RIESLING WEISS	GEN_DNA_2105	10077	5.06069	0.0655217	4
Central Europe	ROI DES PRECOCES	GEN_DNA_1370	10165	4.98568	0.35292	4
Central Europe	SCHEUREBE	GEN_DNA_1076	10818	4.1997	-0.280444	4
Central Europe	SYRAH	GEN_DNA_2158	11748	4.99371	0.461882	4
Central Europe	TRESSOT	GEN_DNA_2468	12640	4.8897	1.75223	4
Central Europe	VERDOT PETIT	GEN_DNA_0915	12974	5.12389	-0.0706337	4
Iberian Peninsula	AGUA SANTA	GEN_DNA_2346	123	1.65829	3.10406	3
Iberian Peninsula	AIREN	GEN_DNA_0885	157	0.928654	3.72299	3
Iberian Peninsula	ALEDO	GEN_DNA_0688	262	1.29623	1.78768	3
Iberian Peninsula	ALFROCHEIRO	GEN_DNA_2173	277	4.07044	2.62641	4
Iberian Peninsula	ALVARELHAO	GEN_DNA_0815	1650	4.37735	2.62274	4
Iberian Peninsula	ALVARINHO	GEN_DNA_2096	15689	5.42913	1.98652	4
Iberian Peninsula	ARGAMUSA	GEN_DNA_3754	585	1.80085	2.98948	3
Iberian Peninsula	BOBAL	GEN_DNA_2187	1493	1.60551	3.1176	3
Iberian Peninsula	BORRACAL	GEN_DNA_0896	1564	3.95419	2.67425	4
Iberian Peninsula	CASTELAO	GEN_DNA_1168	2324	3.41555	3.19086	3
Iberian Peninsula	CASTELLANA BLANCA	GEN_DNA_2397	26280	2.34616	4.41352	3
Iberian Peninsula	CAYETANA	GEN_DNA_1089	5648	2.20041	2.81075	3
Iberian Peninsula	DERECHERO	GEN_DNA_2391	3525	2.05578	3.39785	3
Iberian Peninsula	FERNAO PIRES	GEN_DNA_1495	4100	2.92143	4.42541	3
Iberian Peninsula	GARNACHA	GEN_DNA_1456	4461	1.08392	2.48283	3
Iberian Peninsula	GOUVEIO	GEN_DNA_1133	12953	3.9515	3.43335	3
Iberian Peninsula	GRACIANO	GEN_DNA_1321	4935	2.74892	2.45278	3
Iberian Peninsula	LISTAN PRIETO	GEN_DNA_1274	6860	1.05769	3.08604	3
Iberian Peninsula	LOUREIRO BLANCO	GEN_DNA_0836	6912	4.32229	1.1751	4
Iberian Peninsula	MALVAR	GEN_DNA_2376	7254	1.67688	2.69343	3
Iberian Peninsula	MATURANA BLANCA	GEN_DNA_0205	7518	3.85652	4.74753	4
Iberian Peninsula	MOLAR	GEN_DNA_2128	15678	4.19975	2.4849	4
Iberian Peninsula	NAPARO	GEN_DNA_1187	8345	2.84278	2.9278	3
Iberian Peninsula	PALOMINO	GEN_DNA_1063	8888	1.07845	1.4889	3
Iberian Peninsula	PEDRO XIMENEZ	GEN_DNA_1207	9080	2.34575	3.08425	3
Iberian Peninsula	TEMPRANILLO	GEN_DNA_1316	12350	1.25804	2.19601	3
Iberian Peninsula	TINTO VELASCO	GEN_DNA_1017	17353	2.3732	1.96411	3
Iberian Peninsula	TOURIGA NACIONAL	GEN_DNA_0760	12594	3.59232	2.10965	4
Iberian Peninsula	TRINCADEIRA	GEN_DNA_1239	15685	2.18307	1.92168	3
Iberian Peninsula	XARELLO	GEN_DNA_1257	13270	0.737609	4.08907	3
