# Supplementary material for: The genetic characterization of grapevines prospected in old Serbian vineyards reveals multiple relationships between traditional varieties of the Balkans
Source: Front Plant Sci. 2024 Jul 11;15:1391679. doi: 10.3389/fpls.2024.1391679 (PMC11269227; doi:10.3389/fpls.2024.1391679)
Supplement: Supplementary file 5 [file Table_3.xlsx]

## Sheet: SM3
Supplementary Material 3. SSR and SNP profiles obtained for the 59 non-redundant grapevine genotypes found in this study. DAPC loadings on factor 1 (F1) and factor 2 (F2), and DAPC cluster assignment is also indicated.
Variety Name	ICVV Genotype Number	VIVC Number	DAPC loading F11	DAPC loading F21	DAPC cluster1	VVS2	VVMD5	VVMD7	VVMD27	VVMD32	VrZAG62	VrZAG79	SNP1003_336	SNP1015_67	SNP1027_69	SNP1035_226	SNP1079_58	SNP1119_176	SNP1127_70	SNP1157_64	SNP1215_138	SNP1229_219	SNP1323_155	SNP1347_100	SNP1349_174	SNP1399_81	SNP1411_565	SNP1445_218	SNP1453_40	SNP1471_179	SNP1513_153	SNP191_100	SNP197_82	SNP227_191	SNP259_199	SNP269_308	SNP325_65	SNP425_205	SNP447_244	SNP555_132	SNP579_187	SNP581_114	SNP593_149	SNP613_315	SNP697_296	SNP819_210	SNP829_281	SNP873_244	SNP879_308
AGADAI	GEN_DNA_0749	95	n.i.	n.i.	n.i.	135:151	230:236	249:249	186:186	250:272	196:200	251:251	A:C	G:G	C:C	C:T	A:G	A:C	G:T	A:T	C:T	C:C	C:C	G:G	A:G	A:A	A:T	G:G	A:A	T:T	C:T	C:C	C:C	A:A	A:T	A:G	A:T	A:A	T:T	A:C	T:T	A:G	C:T	C:C	A:A	A:A	G:G	C:T	G:G
BAKATOR BELYI	GEN_DNA_3779	904	n.i.	n.i.	n.i.	133:143	228:236	239:249	186:195	250:272	194:204	243:251	A:C	A:G	C:C	T:T	A:G	A:C	G:T	T:T	C:T	C:C	A:C	G:G	G:G	A:A	A:T	G:G	A:G	-:-	T:T	C:C	A:C	-:-	A:T	A:A	A:T	A:A	C:C	A:A	T:T	A:G	C:T	T:T	A:A	A:T	A:A	T:T	A:G
BELA DINKA	GEN_DNA_1462	16848	-4.28767	1.8609	1	133:143	228:248	239:247	180:195	256:272	188:194	249:259	C:C	G:G	C:T	T:T	A:G	C:C	G:G	T:T	C:T	C:C	C:C	A:A	A:G	A:A	T:T	A:G	A:G	T:T	T:T	C:C	A:C	A:A	A:T	A:G	A:T	A:A	C:C	A:A	T:T	G:G	C:T	C:C	A:A	A:T	G:G	C:T	A:G
BERBECEL	GEN_DNA_1415	1148	-6.54676	0.663115	1	143:143	240:248	239:249	188:190	252:258	188:194	243:251	C:C	G:G	C:T	C:T	A:G	A:C	G:G	T:T	T:T	C:C	C:C	A:G	A:A	A:A	T:T	G:G	A:A	T:T	T:T	C:C	C:C	A:A	A:T	A:A	A:T	A:A	T:T	A:C	T:T	A:G	C:T	C:C	A:A	T:T	A:A	C:T	A:G
BLAUFRAENKISCH	GEN_DNA_1244	1459	-4.39218	0.587522	1	143:143	228:242	239:249	180:195	250:272	194:204	237:251	C:C	A:G	C:T	T:T	A:G	A:C	G:G	T:T	C:C	C:G	C:C	G:G	A:G	A:A	T:T	A:G	A:A	T:T	C:T	C:C	A:A	C:C	T:T	A:A	T:T	A:A	C:T	A:A	T:T	A:G	T:T	C:C	A:A	A:T	A:A	C:T	A:A
BRAGHINA ROSIE	GEN_DNA_1072	1644	-7.8308	0.330199	1	133:135	228:242	239:239	180:182	256:272	188:196	251:259	C:C	A:G	C:T	T:T	G:G	C:C	G:T	T:T	C:T	C:G	A:C	A:G	A:G	A:A	T:T	G:G	A:A	T:T	C:T	C:C	A:A	A:C	T:T	A:A	A:A	A:A	C:C	A:A	T:T	G:G	C:C	C:T	A:A	T:T	A:A	C:T	A:G
CHAOUCH BLANC	GEN_DNA_1062	10196	n.i.	n.i.	n.i.	135:151	230:240	247:249	180:184	252:272	188:204	247:249	A:C	G:G	T:T	T:T	A:G	A:C	G:G	T:T	C:C	C:C	A:A	A:G	A:A	A:A	T:T	G:G	A:G	C:T	C:T	C:C	C:C	A:A	A:T	G:G	A:T	A:A	T:T	A:C	C:T	G:G	C:T	C:C	A:A	A:T	G:G	C:C	G:G
CHASSELAS	GEN_DNA_2055	2473	n.i.	n.i.	n.i.	133:143	230:238	239:247	186:190	240:240	194:204	251:259	A:A	G:G	C:T	C:T	A:G	A:A	T:T	T:T	C:T	C:C	A:C	G:G	A:G	A:A	T:T	A:G	A:A	T:T	C:C	C:T	C:C	C:C	A:T	A:A	A:T	A:A	C:C	A:C	T:T	A:G	C:C	C:T	A:A	A:T	A:A	T:T	A:A
COARNA ALBA	GEN_DNA_2510	2724	-6.77237	1.00694	1	133:143	240:248	239:239	180:182	264:272	188:188	251:259	A:C	G:G	C:C	C:T	A:G	C:C	G:T	T:T	C:T	C:C	A:C	A:A	A:A	A:A	T:T	G:G	A:G	T:T	T:T	C:C	A:C	A:A	A:T	A:G	A:T	A:A	T:T	A:C	T:T	G:G	C:C	C:C	A:A	T:T	A:G	C:T	A:A
COARNA NEAGRA	GEN_DNA_2052	2726	-5.02538	-2.80935	1	137:143	238:238	247:249	180:186	256:274	188:200	247:251	A:A	G:G	C:T	C:T	A:A	A:C	G:G	T:T	C:T	C:G	A:C	A:G	A:A	A:A	A:T	G:G	A:A	T:T	T:T	C:C	A:C	A:A	A:A	G:G	A:A	A:A	T:T	A:A	T:T	G:G	C:C	C:C	A:G	A:T	A:G	C:C	A:G
CSABA GYOENGYE	GEN_DNA_2019	9166	n.i.	n.i.	n.i.	133:155	238:238	247:249	180:182	272:272	186:204	255:259	A:A	A:G	C:T	C:T	A:G	A:C	G:T	A:T	C:C	C:C	A:C	G:G	A:A	A:A	A:T	A:G	A:A	C:T	C:C	C:T	A:C	A:A	T:T	G:G	A:A	A:A	C:T	A:C	T:T	A:G	C:C	C:C	A:A	A:T	A:G	C:T	A:A
DIMYAT	GEN_DNA_0653	5716	-7.50967	0.45834	1	143:143	242:248	239:249	180:182	250:264	188:204	237:259	A:C	A:G	C:T	T:T	A:G	A:C	G:G	T:T	C:T	C:G	A:C	A:G	A:A	A:A	T:T	A:G	A:A	T:T	T:T	C:C	A:C	A:C	T:T	A:A	A:T	A:A	T:T	A:C	T:T	A:G	C:T	C:T	A:A	T:T	A:A	C:T	A:A
EZERJO	GEN_DNA_0142	4027	n.i.	n.i.	n.i.	133:143	228:234	239:239	180:186	256:272	188:188	237:251	-:-	-:-	-:-	-:-	-:-	-:-	-:-	-:-	-:-	-:-	-:-	-:-	-:-	-:-	-:-	-:-	-:-	-:-	-:-	-:-	-:-	-:-	-:-	-:-	-:-	-:-	-:-	-:-	-:-	-:-	-:-	-:-	-:-	-:-	-:-	-:-	-:-
FERDINAND DE LESSEPS	GEN_DNA_9079	4088	n.i.	n.i.	n.i.	149:151	234:234	235:249	180:180	272:272	186:202	237:255	A:A	A:G	C:T	C:T	A:G	A:A	G:G	A:T	T:T	C:C	A:C	G:G	A:G	A:A	T:T	A:G	G:G	T:T	C:T	C:C	A:C	A:A	T:T	A:G	A:A	A:A	T:T	A:A	T:T	A:A	C:C	C:C	A:A	A:T	A:A	T:T	A:A
FURMINT	GEN_DNA_0689	4292	-7.2641	0.220831	1	133:153	228:242	239:249	180:195	264:272	188:204	237:249	A:C	A:G	T:T	T:T	A:G	A:C	G:T	T:T	T:T	C:G	C:C	A:G	A:G	A:A	T:T	G:G	A:A	T:T	T:T	C:C	A:C	A:C	A:T	A:A	A:T	A:A	C:T	A:C	T:T	A:G	C:T	C:T	A:A	A:T	A:A	C:T	A:G
GRK CRNI	GEN_DNA_3780	5067	-5.83365	-0.140552	1	133:135	230:238	239:249	182:195	256:264	194:196	249:249	A:C	G:G	C:C	T:T	G:G	A:C	G:G	A:T	C:T	C:G	A:C	G:G	A:A	A:A	T:T	G:G	A:A	-:-	T:T	C:C	A:A	-:-	A:T	A:A	A:A	A:A	C:C	C:C	T:T	G:G	C:T	C:C	A:A	A:T	A:G	T:T	G:G
HARSLEVELUE	GEN_DNA_1247	5314	-6.28589	0.289305	1	133:145	228:234	239:247	180:180	264:272	188:204	237:251	C:C	A:G	C:T	T:T	A:G	C:C	G:G	T:T	C:T	C:G	C:C	A:G	G:G	A:A	T:T	G:G	A:G	T:T	T:T	C:C	A:C	A:A	A:A	A:G	A:T	A:A	C:C	C:C	T:T	A:G	C:T	C:T	A:A	A:A	A:A	C:T	A:G
KADARKA FEHER	GEN_DNA_3792	5899	-8.92385	0.477136	1	133:135	242:242	239:239	180:186	252:272	196:196	251:251	C:C	A:G	T:T	C:T	A:G	C:C	G:G	T:T	C:T	C:G	C:C	G:G	A:G	A:A	T:T	A:G	A:A	-:-	C:C	C:C	A:C	-:-	T:T	A:A	A:A	A:A	C:T	A:C	T:T	A:G	C:T	C:C	A:A	T:T	A:A	C:T	A:G
KADARKA KEK	GEN_DNA_0351	5898	-8.74183	0.0553012	1	133:135	228:228	247:255	186:195	272:272	188:204	249:251	A:A	G:G	C:T	T:T	G:G	C:C	G:G	T:T	C:T	C:G	C:C	A:G	A:G	A:A	T:T	G:G	A:A	T:T	T:T	C:C	C:C	A:C	A:T	A:A	T:T	A:A	C:C	C:C	T:T	A:G	C:C	C:C	A:A	T:T	A:A	C:T	G:G
KADARKA SRB	GEN_DNA_3761	24623	-5.11012	0.945902	1	135:143	234:242	249:249	182:190	250:268	194:204	243:243	C:C	A:G	T:T	T:T	A:A	C:C	G:T	T:T	C:C	G:G	C:C	G:G	A:A	A:A	T:T	G:G	A:G	-:-	T:T	C:C	A:A	-:-	A:T	A:A	A:T	A:A	C:T	A:A	T:T	A:G	T:T	C:C	A:A	A:A	A:G	C:T	A:A
KNIPPERLE	GEN_DNA_3791	6312	n.i.	n.i.	n.i.	143:151	230:236	239:239	180:190	240:250	194:196	237:245	A:C	G:G	C:T	T:T	G:G	A:A	G:T	T:T	C:T	C:G	C:C	G:G	A:G	A:G	A:T	G:G	A:A	-:-	C:T	C:C	A:A	-:-	T:T	A:A	A:T	A:A	C:T	A:A	T:T	A:G	T:T	C:T	A:A	A:T	A:G	C:T	A:A
KOEVIDINKA	GEN_DNA_2568	13727	-6.59147	1.26977	1	133:143	236:242	239:249	182:188	252:272	188:194	251:259	C:C	A:G	C:T	C:T	A:G	A:C	G:T	T:T	C:C	C:G	C:C	A:G	G:G	A:A	T:T	G:G	A:A	T:T	C:T	C:C	A:A	A:A	A:T	A:A	A:T	A:A	C:T	A:C	T:T	A:G	C:T	C:T	A:A	T:T	A:A	C:T	A:G
KOKUR BELYI	GEN_DNA_2343	6375	n.i.	n.i.	n.i.	145:145	230:240	239:249	188:188	250:262	194:204	251:251	C:C	G:G	C:T	T:T	A:G	A:C	G:T	T:T	C:T	C:C	A:C	A:G	A:A	A:A	T:T	A:G	A:G	T:T	T:T	C:C	A:C	C:C	A:T	A:G	A:T	A:A	C:T	C:C	T:T	A:G	C:T	C:T	A:A	T:T	A:G	C:C	G:G
KREACA	GEN_DNA_3783	6501	-6.90784	1.33994	1	133:143	242:248	239:247	180:182	252:264	188:204	251:259	C:C	G:G	C:C	C:T	A:G	C:C	G:T	T:T	C:T	C:C	A:C	A:G	A:A	A:A	T:T	G:G	A:G	-:-	T:T	C:T	C:C	-:-	T:T	A:G	A:A	A:C	T:T	A:C	T:T	A:G	C:T	C:C	A:A	A:T	A:A	C:C	A:G
KRIVAJA	GEN_DNA_3784	24929	-5.06651	0.89988	1	139:143	234:234	239:239	186:186	252:272	188:188	251:251	C:C	G:G	C:T	T:T	A:A	C:C	G:T	T:T	T:T	C:C	A:A	A:A	A:A	A:A	T:T	G:G	A:A	-:-	C:T	C:C	A:A	-:-	A:T	A:A	A:A	A:A	T:T	A:C	T:T	A:G	C:T	C:T	A:A	T:T	A:G	T:T	A:G
KRKOSIJA	GEN_DNA_2771	16850	-6.18636	0.00745374	1	133:153	228:232	239:239	180:195	250:272	188:196	249:249	A:A	A:G	T:T	T:T	A:G	C:C	G:T	T:T	C:T	C:G	C:C	A:G	G:G	A:A	T:T	G:G	A:A	C:T	C:T	C:C	A:C	A:C	A:A	A:A	T:T	A:A	C:C	A:C	T:T	A:G	C:T	C:T	A:G	T:T	A:G	C:T	A:G
LISZTES FEHER	GEN_DNA_3366	17061	-4.71571	1.77539	1	133:145	234:242	247:249	180:182	248:258	204:204	237:259	C:C	A:G	C:T	T:T	G:G	A:C	G:G	T:T	T:T	-:-	C:C	G:G	A:G	A:A	T:T	A:G	A:A	T:T	T:T	C:T	C:C	A:C	T:T	A:G	A:A	A:A	C:T	A:A	T:T	A:G	T:T	C:T	A:A	A:T	A:G	T:T	G:G
MOSCATO GIALLO	GEN_DNA_1341	8056	n.i.	n.i.	n.i.	133:143	230:242	239:249	180:180	258:272	186:188	249:255	C:C	G:G	C:C	T:T	A:A	A:A	G:T	A:T	C:C	C:C	C:C	A:G	A:G	A:A	A:T	G:G	A:G	C:C	C:C	C:T	A:C	A:A	T:T	A:G	A:A	A:C	C:C	A:C	T:T	A:G	C:C	C:C	A:A	T:T	A:G	T:T	A:G
MUSCAT A PETITS GRAINS	GEN_DNA_2234	8193	-6.28126	0.00459437	1	133:133	230:238	233:249	180:195	264:272	186:196	251:255	C:C	G:G	C:C	T:T	A:G	A:C	G:T	A:T	C:C	C:C	C:C	G:G	A:A	A:A	A:T	G:G	A:G	C:T	C:T	C:T	A:C	A:A	T:T	A:G	A:A	A:A	C:C	A:C	T:T	A:G	C:T	C:C	A:A	T:T	A:A	T:T	A:G
MUSCAT FLEUR D'ORANGER	GEN_DNA_0799	8221	n.i.	n.i.	n.i.	133:133	230:238	247:249	180:186	240:272	186:204	251:255	A:C	G:G	C:C	T:T	A:A	A:C	G:T	A:T	C:C	C:C	C:C	G:G	A:A	A:A	A:T	A:G	A:G	C:T	C:C	C:T	A:C	A:A	A:T	A:G	A:A	A:A	C:C	A:C	T:T	A:G	C:C	C:C	A:A	T:T	A:A	T:T	A:A
MUSTOASA DE MADERAT	GEN_DNA_3793	8311	-5.65023	-0.458486	1	143:145	234:242	247:249	182:195	264:272	204:204	243:249	A:C	A:G	C:T	T:T	A:G	A:C	G:T	T:T	C:T	C:G	C:C	G:G	G:G	A:A	T:T	A:G	A:A	-:-	T:T	C:C	C:C	-:-	A:T	A:A	A:T	A:A	T:T	A:C	T:T	A:G	C:T	C:C	A:A	A:T	A:G	C:T	A:A
NEGRU VIRTOS	GEN_DNA_1041	8466	-5.28451	-0.677692	1	143:143	230:236	249:249	180:186	264:272	194:204	237:251	A:C	G:G	T:T	C:T	A:G	C:C	G:G	T:T	C:T	C:G	A:C	G:G	A:G	A:A	T:T	A:G	A:A	T:T	T:T	C:C	A:A	A:C	A:T	A:G	A:A	A:A	T:T	A:C	T:T	G:G	C:T	C:C	A:A	A:T	A:G	C:C	A:G
OHRIDSKO BELO	GEN_DNA_3775	21403	-5.55031	0.257094	1	143:143	236:248	247:249	188:195	252:272	194:204	249:251	C:C	G:G	T:T	C:T	A:A	A:C	G:G	T:T	C:T	C:C	C:C	G:G	A:G	A:A	T:T	G:G	A:A	-:-	C:T	C:C	A:C	-:-	A:T	A:A	A:T	A:A	C:T	C:C	T:T	A:A	C:T	C:C	A:A	A:T	A:A	C:T	A:G
PAMID	GEN_DNA_1218	8899	-5.68985	1.66982	1	135:143	228:248	239:239	184:190	252:256	188:188	243:251	C:C	A:G	C:T	C:T	G:G	A:C	G:G	T:T	T:T	C:C	C:C	A:A	A:G	A:A	A:T	G:G	A:A	T:T	T:T	C:C	C:C	A:C	A:T	A:A	A:T	A:A	T:T	A:A	T:T	A:G	C:C	C:T	A:A	A:T	A:G	C:T	A:A
PARMAK CERVEN	GEN_DNA_0883	8945	n.i.	n.i.	n.i.	139:143	234:248	239:247	182:186	252:272	186:188	251:259	A:C	G:G	C:T	C:T	A:A	C:C	G:T	T:T	C:T	C:C	A:A	A:G	A:A	A:A	A:T	G:G	A:G	T:T	C:T	C:C	A:C	A:A	T:T	A:G	A:A	A:A	T:T	A:C	T:T	G:G	C:C	C:T	A:A	A:T	A:A	C:T	A:G
PINOT	GEN_DNA_2107	9279	6.07496	1.77153	4	137:151	230:240	239:243	186:190	240:272	188:194	239:245	A:C	A:G	C:C	T:T	G:G	A:A	T:T	A:T	C:T	C:G	A:C	A:G	A:A	A:G	A:T	A:G	A:A	C:T	C:C	C:T	A:A	A:A	A:T	A:A	A:A	A:A	C:C	A:A	T:T	G:G	C:T	C:T	A:A	A:T	A:G	C:T	A:A
PROKUPAC	GEN_DNA_0916	9734	-7.82301	-0.433396	1	143:145	228:230	249:249	182:186	272:272	194:200	243:251	A:C	G:G	C:T	C:T	G:G	C:C	G:G	T:T	C:C	C:G	A:C	G:G	A:A	A:A	T:T	A:G	A:G	T:T	C:T	C:C	A:C	A:A	A:T	A:G	A:A	A:A	T:T	A:C	T:T	A:G	C:T	C:C	A:A	T:T	A:A	C:T	G:G
PURCSIN	GEN_DNA_4547	9822	-5.25749	1.46597	1	133:133	228:228	239:239	180:190	250:272	188:194	247:255	A:A	A:G	C:T	T:T	G:G	C:C	G:T	T:T	C:C	C:C	C:C	A:G	G:G	A:A	T:T	A:G	A:A	-:-	C:C	C:C	A:A	-:-	A:T	A:A	A:T	A:A	C:C	A:A	T:T	A:G	T:T	C:C	A:G	T:T	A:A	C:T	A:G
RUZA BIJELA	GEN_DNA_4548	10419	-5.06467	-1.1326	1	133:143	240:242	239:249	182:182	264:272	188:204	243:259	A:C	G:G	C:C	C:T	A:G	A:C	G:T	T:T	T:T	C:G	A:A	A:G	A:G	A:A	A:T	G:G	A:A	-:-	T:T	C:C	A:C	-:-	A:T	A:A	A:A	A:A	T:T	C:C	T:T	A:G	C:T	C:C	A:A	T:T	A:A	C:C	A:A
SEDUCHA	GEN_DNA_4549	10855	-6.41344	-0.770954	1	133:135	228:228	247:255	182:195	248:272	188:204	249:259	A:C	G:G	C:T	T:T	A:G	C:C	G:T	T:T	C:T	C:G	C:C	A:G	G:G	A:A	T:T	G:G	A:A	-:-	T:T	C:T	A:C	-:-	A:T	A:A	A:T	A:A	C:T	C:C	T:T	A:G	C:T	C:T	A:A	T:T	A:G	C:C	G:G
SEMILLON	GEN_DNA_2185	11480	n.i.	n.i.	n.i.	133:133	238:240	239:257	176:186	240:272	188:194	247:251	A:C	G:G	C:T	T:T	G:G	A:A	G:T	A:T	T:T	C:C	A:A	A:G	A:A	A:A	T:T	A:G	A:A	C:T	C:C	C:T	A:A	A:A	T:T	A:G	A:A	A:C	C:T	A:C	T:T	A:G	C:T	C:C	A:A	A:T	A:G	C:T	A:G
SREMSKA ZELENIKA	GEN_DNA_3787	15934	-7.08036	0.927655	1	133:133	228:242	239:247	180:195	250:272	188:204	249:255	A:C	A:G	T:T	T:T	A:G	A:C	G:T	T:T	C:T	C:G	C:C	A:G	A:G	A:A	T:T	A:G	A:A	-:-	C:T	C:C	A:C	-:-	A:T	A:A	A:A	A:A	C:C	A:A	T:T	A:G	T:T	C:C	A:A	T:T	A:A	C:T	G:G
STANUSINA CRNA	GEN_DNA_3770	11994	-5.38285	-0.0166012	1	133:135	234:240	239:249	182:186	250:272	188:194	243:259	A:C	G:G	C:T	C:T	A:A	C:C	G:G	T:T	C:T	C:G	C:C	-:-	A:A	A:A	T:T	G:G	G:G	-:-	T:T	C:C	A:A	-:-	A:T	A:G	A:A	A:A	T:T	A:C	T:T	A:G	C:T	C:C	A:A	A:T	A:G	C:T	A:A
TAMJANIKA CRNA	GEN_DNA_1446	8057	-7.08063	0.307163	1	133:135	238:242	239:249	180:195	264:272	186:188	249:255	C:C	G:G	C:T	T:T	A:G	A:C	G:T	A:T	C:T	C:C	A:C	A:G	A:A	A:A	T:T	G:G	A:G	C:T	C:T	C:T	C:C	A:A	T:T	A:G	A:A	A:A	C:T	A:C	T:T	G:G	T:T	C:C	A:A	T:T	A:A	C:T	G:G
Unknown SRB #01	GEN_DNA_4542	-	-6.05077	0.23971	1	133:143	242:242	239:249	180:184	256:274	196:204	237:251	C:C	A:G	T:T	T:T	A:G	C:C	G:G	T:T	T:T	C:G	C:C	G:G	A:G	A:A	A:T	G:G	A:A	-:-	T:T	C:C	A:A	-:-	T:T	A:G	T:T	A:A	C:T	A:A	T:T	A:A	C:T	T:T	A:A	A:T	A:G	T:T	A:G
Unknown SRB #03	GEN_DNA_4543	-	-3.66732	2.04603	1	137:145	240:240	243:249	190:195	250:272	188:204	245:257	C:C	A:A	C:T	T:T	A:G	A:C	G:G	T:T	C:C	C:G	A:C	A:G	A:A	A:A	T:T	G:G	A:A	-:-	T:T	C:C	A:C	-:-	A:T	A:A	A:A	A:A	T:T	A:A	C:T	A:G	T:T	C:T	A:A	A:T	A:G	T:T	A:A
Unknown SRB #04	GEN_DNA_4544	-	-7.08206	0.356723	1	133:135	228:248	239:249	180:180	264:272	188:204	237:251	A:C	A:G	C:T	T:T	G:G	A:C	G:T	T:T	C:T	C:C	C:C	A:G	A:G	A:A	T:T	G:G	A:G	-:-	T:T	C:C	A:C	-:-	T:T	A:G	A:T	A:A	C:T	A:A	T:T	A:G	C:T	C:T	A:A	T:T	A:G	C:T	A:A
Unknown SRB #05	GEN_DNA_4545	-	-6.88981	-0.0539826	1	133:143	230:240	239:249	180:190	256:258	188:194	243:257	A:C	G:G	C:C	C:T	A:G	C:C	G:G	T:T	C:T	C:C	C:C	A:G	A:A	A:A	T:T	G:G	A:G	-:-	T:T	C:C	C:C	-:-	A:T	A:G	A:T	A:A	C:T	A:C	T:T	G:G	C:C	C:C	A:G	A:T	A:G	T:T	A:A
Unknown SRB #06	GEN_DNA_4546	-	1.45171	0.568885	4	151:155	242:242	239:263	182:190	240:240	194:194	251:251	A:A	G:G	C:C	C:T	G:G	C:C	T:T	A:T	C:T	G:G	C:C	G:G	A:G	A:A	A:A	A:A	A:A	-:-	C:T	T:T	A:A	-:-	T:T	A:A	A:A	A:A	C:C	A:A	T:T	G:G	C:T	C:T	A:A	T:T	A:A	T:T	A:A
Unknown SRB #07	GEN_DNA_3778	-	-6.75613	0.958478	1	133:135	228:242	239:247	180:182	258:272	188:204	237:259	C:C	G:G	T:T	T:T	G:G	C:C	G:G	T:T	C:T	C:G	C:C	A:G	A:G	A:A	T:T	A:G	A:A	-:-	T:T	C:C	A:C	-:-	T:T	A:G	A:A	A:A	C:C	A:A	T:T	G:G	C:T	T:T	A:A	T:T	A:G	T:T	A:G
Unknown SRB #08	GEN_DNA_3782	-	-5.9299	-0.695299	1	133:153	236:240	247:255	182:186	252:258	202:204	237:259	C:C	G:G	C:T	T:T	A:G	C:C	G:T	A:T	C:C	C:G	C:C	G:G	A:G	A:A	T:T	A:G	A:G	-:-	T:T	C:T	A:A	-:-	A:T	A:G	A:T	A:A	C:T	A:C	T:T	G:G	C:T	C:T	A:A	T:T	A:A	C:C	G:G
Unknown SRB #09	GEN_DNA_3789	-	-6.78726	1.31824	1	143:143	228:236	239:255	182:184	264:272	196:204	243:249	A:C	G:G	C:C	T:T	A:A	C:C	G:T	A:T	C:C	C:C	C:C	G:G	G:G	A:A	T:T	G:G	A:A	-:-	C:T	C:C	A:A	-:-	A:T	A:A	T:T	A:A	C:T	A:C	T:T	A:G	C:T	C:T	A:G	T:T	A:G	T:T	A:A
Unknown SRB #10	GEN_DNA_3786	-	-6.06689	1.79508	1	135:145	228:230	249:249	182:190	250:272	194:200	243:251	A:C	G:G	C:C	T:T	G:G	A:C	G:G	A:T	C:C	C:G	A:C	A:G	A:A	A:A	T:T	A:G	A:A	-:-	C:C	C:C	A:C	-:-	A:T	A:A	A:T	A:A	C:T	A:A	T:T	A:G	C:T	C:T	A:A	T:T	A:A	T:T	G:G
Unknown SRB #11	GEN_DNA_3794	-	-4.13555	0.641214	1	135:143	234:242	249:253	184:195	256:256	188:194	251:259	C:C	A:G	C:T	T:T	A:G	C:C	G:G	T:T	T:T	C:G	C:C	G:G	A:G	A:A	A:T	A:G	A:G	-:-	C:T	C:C	A:C	-:-	A:T	A:G	A:T	A:A	C:T	A:A	T:T	A:G	T:T	C:T	A:A	A:T	G:G	T:T	A:G
VILLARD BLANC	GEN_DNA_7449	13081	n.i.	n.i.	n.i.	133:143	234:238	237:251	182:190	240:256	180:194	255:261	A:A	G:G	T:T	T:T	A:G	A:C	G:G	T:T	C:T	C:C	A:C	G:G	A:A	A:A	A:T	G:G	A:G	C:C	C:T	C:C	C:C	A:A	T:T	A:A	A:A	A:A	C:C	A:C	T:T	A:A	C:T	C:T	A:A	A:A	G:G	T:T	A:G
ZACINAK	GEN_DNA_4550	13400	-6.95487	-0.616697	1	135:145	228:248	249:255	186:195	272:272	194:204	249:251	A:C	G:G	C:T	T:T	A:G	C:C	G:G	T:T	T:T	C:G	C:C	G:G	A:A	A:A	T:T	G:G	A:G	-:-	T:T	C:C	A:C	-:-	A:T	A:G	A:T	A:A	C:C	A:A	T:T	A:G	C:T	C:C	A:A	T:T	G:G	C:T	A:G
ZILAVKA	GEN_DNA_2338	13446	-6.7883	0.719109	1	133:153	228:240	239:239	180:195	252:264	188:188	249:249	A:C	G:G	T:T	T:T	A:G	A:A	G:T	T:T	C:T	C:G	C:C	A:A	A:G	A:A	T:T	A:G	A:A	C:T	C:T	C:C	A:C	A:C	A:A	A:A	T:T	A:A	C:T	A:C	T:T	A:G	C:T	C:C	A:A	T:T	G:G	C:T	G:G
ZUNIC	GEN_DNA_3788	15923	-5.1497	0.847875	1	135:143	228:248	239:247	180:182	264:272	188:194	251:259	A:C	A:G	C:C	C:T	A:A	A:C	G:T	T:T	C:C	C:C	C:C	-:-	A:G	A:A	A:T	G:G	A:G	-:-	T:T	C:C	A:C	-:-	T:T	A:G	T:T	A:A	C:C	A:C	T:T	G:G	C:T	C:T	A:A	T:T	A:G	C:T	A:G
ZUPLJANKA	GEN_DNA_3258	13480	n.i.	n.i.	n.i.	145:151	230:230	243:249	186:186	272:272	188:200	239:251	A:C	G:G	C:T	T:T	G:G	A:C	G:T	T:T	C:C	C:C	A:C	A:G	A:A	A:A	A:T	G:G	A:G	-:-	C:T	C:T	A:C	-:-	A:T	A:G	A:A	A:A	C:T	A:A	T:T	G:G	C:T	C:C	A:A	T:T	A:A	C:T	A:G
1 n.i.: not included in the DAPC anlaysis
[truncated: 203 more columns]
