# Supplementary material for: The genetic characterization of grapevines prospected in old Serbian vineyards reveals multiple relationships between traditional varieties of the Balkans
Source: Front Plant Sci. 2024 Jul 11;15:1391679. doi: 10.3389/fpls.2024.1391679 (PMC11269227; doi:10.3389/fpls.2024.1391679)
Supplement: Supplementary file 6 [file Table_4.xlsx]

## Sheet: SM4
Supplementary Material 4. Summary of the trios (offspring and parents) identified in this study. If available, the VIVC variety number for the grapevine cultivar is given.
Offspring	Offspring: ICVV code	Offspring: VIVC variety number	Offspring: Chlorotype	Parent 1	Parent 1: ICVV code	Parent 1: VIVC variety number	Parent 1: Chlorotype	Parent 2	Parent 2: ICVV code	Parent 2: VIVC variety number	Parent 2: Chlorotype	Compared SNPs	Mismatching SNPs	LOD score	Compared SSRs	Mismatching SSRs	Bred cultivar	Described cross	References to pedigree confirmed my markers
AUGSTER WEISS	3323	767	C	ALBA IMPUTOTATO	3419	14766	C	LISZTES FEHER	3366	17061	C	149	0	58.38	9	0	No	ALBA IMPUTOTATO × LISZTES FEHER	Lacombe et al. 2013; Laucou et al. 2018; D'Onofrio et al. 2021
BAKARKA	2821	903	-	KOEVIDINKA	2568	13727	C	KADARKA KEK	351	5898	D	222	1	88.16	9	1	Yes	KOEVIDINKA × KADARKA	Lacombe et al. 2013
BRANCO DESCONHECIDO	2957	17659	C	BRAGHINA ROSIE	1072	1644	C	FURMINT	689	4292	C	214	1	91.28	7	0	No	FURMINT × KADARKA BELA	Cunha et al. 2020
CSABA GYOENGYE	2019	9166	C	MADELEINE ANGEVINE	114	7064	C	MUSCAT FLEUR D'ORANGER	799	8221	D	233	0	83.41	9	0	Yes	MADELEINE ANGEVINE × MUSCAT FLEUR D'ORANGER	Lacombe et al. 2013; Margaryan et al. 2021
DIMYAT	653	5716	C	COARNA ALBA	2510	2724	C	HEUNISCH WEISS	1245	5374	C	231	2	71.8	9	0	No	HEUNISCH WEISS × COARNA ALBA	Lacombe et al. 2013; Laucou et al. 2018; D'Onofrio et al. 2021
EZEREVES MAGYARORSZAG EMLEKE	134	4025	-	CHASSELAS	2055	2473	D	AHMEUR BOU AHMEUR	473	140	C	221	2	86.68	9	0	Yes	CHASSELAS BLANC × AHMEUR BOU AHMEUR	Lacombe et al. 2013
FURMINT	689	4292	C	ALBA IMPUTOTATO	3419	14766	C	HEUNISCH WEISS	1245	5374	C	229	0	66.78	9	0	No	HEUNISCH WEISS × ALBA IMPUTOTATO	Lacombe et al. 2013; Laucou et al. 2018; Zuhl-Mihaljevic et al. 2020; D'Onofrio et al. 2021
GODOMINKA	3781	16003	C	DIMYAT	653	5716	C	MUSCAT OTTONEL	712	8243	C	221	0	82.2	9	0	Yes	DIMYAT × MUSCAT OTTONEL	Röckel et al. (in preparation)
GROCANKA	117	5069	C	CSABA GYOENGYE	2019	9166	C	AFUS ALI	2036	122	A	225	0	93.89	9	0	Yes	CSABA GYOENGYE × AFUS ALI	Lacombe et al. 2013
IRSAI OLIVER	523	5557	C	CSABA GYOENGYE	2019	9166	C	POZSONYI	3373	9653	C	164	1	54.85	9	0	Yes	POZSONYI × CSABA GYOENGYE	Kiss et al. 2005; Lacombe et al. 2013; Laucou et al. 2018; D'Onofrio et al. 2021
JO RIZLING	2876	5764	-	CHASSELAS	2055	2473	D	WELSCHRIESLING	631	13217	A	222	0	85.24	7	0	Yes	WELSCHRIESLING × CHASSELAS	Lacombe et al. 2013
KADARKA FEHER	3792	5899	C	BRAGHINA ROSIE	1072	1644	C	IORDAN	3312	5544	D	216	0	70.25	9	0	No	BAKATOR BELYI × KADARKA	This work
KNIPPERLE	3791	6312	A	PINOT	2107	9279	A	HEUNISCH WEISS	1245	5374	C	223	0	63.6	9	0	Yes	PINOT × HEUNISCH WEISS	Lacombe et al. 2013
KOEVIDINKA	2568	13727	C	BRAGHINA ROSIE	1072	1644	C	OHRIDSKO BELO	3775	21403	D	230	2	71.16	9	0	No	-	This work
KRIVAJA	3784	24929	C	PARMAK CERVEN	883	8945	C	DARDAGAN	1361	3430	C	224	0	92.5	9	0	No	-	This work
KRKOSIJA	2771	16850	C	ALBA IMPUTOTATO	3419	14766	C	LIPOLIST	3762	6854	C	217	1	60.93	9	0	No	ALBA IMPUTOTATO × ?	Maras et al, 2020
MATHIASZ JANOSNE	703	7503	-	CHASSELAS	2055	2473	D	MUSCAT OF ALEXANDRIA	2153	8241	B	221	1	67.77	9	0	Yes	MUSCAT OF ALEJANDRIA × CHASSELAS	Vargas et al. 2009; Lacombe et al. 2013; Ghaffari et al. 2014
MISKET DUNAVSKI	292	7864	-	CHAOUCH BLANC	1062	10196	C	MUSCAT HAMBURG	2047	8226	D	225	1	72.97	9	0	Yes	CHAOUCH BLANC × MUSCAT HAMBURG	Ghaffari et al. 2014
MANASTIRSKO BELO	3774	24597	C	PARMAK CERVEN	883	8945	C	HEPTAKILO	28	5207	B	223	0	84.76	9	1	No	-	This work
MUSCAT FLEUR D'ORANGER	799	8221	D	CHASSELAS	2055	2473	D	MUSCAT A PETITS GRAINS	2234	8193	D	199	1	66.86	9	0	No	MUSCAT A PETITS GRAINS BLANCS × CHASSELAS	Schneider et al. 2008; Lacombe et al. 2013; Zinelabidine et al. 2014; Raimondi et al. 2020
PAPASKARASI	3554	8923	C	ALBA IMPUTOTATO	3419	14766	C	PROKUPAC	916	9734	D	149	1	65.6	9	0	No	ALBA IMPUTOTATO × PROKUPAC	Lacombe et al. 2013; Laucou et al. 2018; D'Onofrio et al. 2021
PECSI ALDAS	2169	9074	-	BICANE	847	1341	C	CHASSELAS	2055	2473	D	221	0	96.05	9	0	Yes	BICANE × GOLDEN QUEEN	This work
PECSI SZAGOS	1298	9075	C	COARNA ALBA	2510	2724	C	MUSCAT A PETITS GRAINS	2234	8193	D	221	0	77.91	9	0	No	COARNA ALBA × MUSCAT A PETITS GRAINS BLANCS	Vargas et al. 2009; Lacombe et al. 2013
PROBUS	3785	9719	D	KADARKA KEK	351	5898	D	CABERNET SAUVIGNON	247	1929	D	221	0	89.24	8	1	Yes	KADARKA KEK × CABERNET SAUVIGNON	This work
RADMILOVACKI MUSKAT	198	9871	A	KOENIGIN DER WEINGAERTEN	2035	6350	A	MUSCAT HAMBURG	2047	8226	D	223	2	86.83	9	1	Yes	KOENIGIN DER WEINGAERTEN × MUSCAT HAMBURG	This work
SLJIVA HERZEGOVACKA	3763	27194	C	COARNA ALBA	2510	2724	C	HEPTAKILO	28	5207	B	224	2	75.9	9	1	No	-	This work
STANUSINA CRNA	3770	11994	C	COARNA ALBA	2510	2724	C	KADARKA SRB	3761	24623	D	223	0	62.28	9	1	No	-	This work
TOTIKA	3354	12586	C	AUGSTER BLAU	3324	765	C	KADARKA KEK	351	5898	D	149	0	65.74	9	1	No	AUGSTER BLAU × KADARKA KEK	Lacombe et al. 2013; Laucou et al. 2018; D'Onofrio et al. 2021
Unknown SRB #03	4543	-	A	ALICANTE HENRI BOUSCHET	1240	304	A	GAMAY NOIR	2210	4377	C	210	1	81	7	1	-	-	This work
Unknown SRB #07	3778	-	C	BRAGHINA ROSIE	1072	1644	C	LISZTES FEHER	3366	17061	C	224	2	74.46	7	0	-	-	This work
Unknown SRB #09	3789	-	D	ZIMMETTRAUBE WEISS	3625	13448	D	HEUNISCH WEISS	1245	5374	C	217	0	68.67	7	0	-	-	This work
Unknown SRB #10	3786	-	D	TERRANO	3760	12374	D	PROKUPAC	916	9734	D	224	0	75.94	7	0	-	-	This work
URMI DINKA	3356	15170	D	IZSAKI SARFEHER	3643	5600	D	KADARKA KEK	351	5898	D	148	0	62.13	9	1	No	IZSAKI SARFEHER × KADARKA	Lacombe et al. 2013; Laucou et al. 2018; D'Onofrio et al. 2021
ZILAVKA	2338	13446	C	ALBA IMPUTOTATO	3419	14766	C	LIPOLIST	3762	6854	C	220	1	69.07	9	0	No	ALBA IMPUTOTATO × DOBROGOSTINA	Stajner et al. 2015
ZUPLJANKA	3258	13480	D	PROKUPAC	916	9734	D	PINOT	2107	9279	A	223	0	72.02	9	0	Yes	PROKUPAC × PINOT NOIR	Maras et al. 2020
