# Supplementary material for: The genetic characterization of grapevines prospected in old Serbian vineyards reveals multiple relationships between traditional varieties of the Balkans
Source: Front Plant Sci. 2024 Jul 11;15:1391679. doi: 10.3389/fpls.2024.1391679 (PMC11269227; doi:10.3389/fpls.2024.1391679)
Supplement: Supplementary file 7 [file Table_5.xlsx]

## Sheet: SM5
Supplementary Material 5. Summary of duos (putative parent-offspring) identified in this study. If available, the VIVC variety number for the grapevine cultivar is given.
Cultivar 1: Name	Cultivar 1: Chlorotype	Cultivar 1: ICVV code	Cultivar 1: VIVC variety number	Cultivar 2: Name	Cultivar 2: Chlorotype	Cultivar 2: ICVV code	Cultivar 2: VIVC variety number	Compared SNPs	Mismatching SNPs	LOD score	Compared SSRs	Mismatching SSRs	References to parent-offspring relationship confirmed my markers
BATTTRAUBE	D	3628	-	PROKUPAC	D	916	9734	149	0	32.04	-	-	-
BELA DINKA *	D	1462	16848	GLERA	D	545	9741	214	1	28.92	9	1	Crespan et al. 2020; D'Onofrio et al. 2021
BELOVINA	C	3771	-	COARNA ALBA	C	2510	2724	214	0	29.17	-	-	-
BERBECEL	D	1415	1148	PAMID	C	1218	8899	206	1	27.65	9	0	Lacombe et al. 2013
BERBECEL	D	1415	1148	Unknown SRB #05	D	4545	-	188	0	28.06	7	0	-
BLAUFRAENKISCH	C	1244	1459	HEUNISCH WEISS	C	1245	5374	229	0	39.92	9	0	Lacombe et al. 2013; Laucou et al. 2018; D'Onofrio et al. 2021
BUDAI ZOELD	-	2304	-	FURMINT	C	689	4292	225	0	36.62	-	-	-
COARNA ALBA	C	2510	2724	KREACA	C	3783	6501	214	0	34	9	0	Lacombe et al. 2013
COARNA ALBA	C	2510	2724	PARMAK CERVEN	C	883	8945	225	0	27.71	9	0	Lacombe et al. 2013; Laucou et al. 2018; Maras et al. 2020; D'Onofrio et al. 2021
FERDINAND DE LESSEPS	-	9079	4088	MUSCAT HAMBURG	D	2047	8226	213	0	28.16	9	0	This work
FURMINT	C	689	4292	HARSLEVELUE	C	1247	5314	227	0	43.65	9	0	Zuhl-Mihaljevic et al. 2020
GRK CRNI	C	3780	5067	VULPEA	D	3240	13186	221	0	25.85	9	0	This work
KADARKA FEHER	C	3792	5899	GALBENA URIASA	C	3379	-	141	0	32.11	-	-	-
KADARKA KEK	D	351	5898	DODRELYABI	B	984	3616	224	0	46.38	9	1	D'Onofrio et al. 2021
KADARKA SRB	D	3761	24623	HEUNISCH WEISS	C	1245	5374	217	0	34.88	9	0	This work
KONCANKA	C	3773	-	PARMAK CERVEN	C	883	8945	223	0	32.51	-	-	-
LISZTES FEHER	C	3366	17061	VELTLINAC ZELENI SRB	A	3790	-	220	0	30.58	-	-	-
MOSCATO GIALLO	A	1341	8056	MUSCAT A PETITS GRAINS	D	2234	8193	225	0	31.74	9	0	Lacombe et al. 2013; Laucou et al. 2018; D'Onofrio et al. 2021
NEGRU VIRTOS	C	1041	8466	PROKUPAC	D	916	9734	226	0	40.09	9	0	Laucou et al. 2018; D'Onofrio et al. 2021
PAPASKARASI	C	3554	8923	KADARKA KEK	D	351	5898	149	0	34.76	9	0	This work
PROSIP CRNI	C	3766	-	COARNA ALBA	C	2510	2724	213	0	29.95	-	-	-
PURCSIN	C	4547	9822	NEGRU DE CAUSANI	C	3656	-	134	0	29.92	-	-	-
RUZA BIJELA	C	4548	10419	COARNA ALBA	C	2510	2724	204	1	26.51	9	0	This work
RUZA BIJELA	C	4548	10419	KREACA	C	3783	6501	204	0	29.15	9	1	This work
SEDUCHA	C	4549	10855	KADARKA KEK	D	351	5898	210	0	45.13	9	0	This work
SREMSKA ZELENIKA	C	3787	15934	PURCSIN	C	4547	9822	204	1	33.7	9	0	Lacombe et al. 2013
TAMJANIKA CRNA	C	1446	8057	MUSCAT A PETITS GRAINS	D	2234	8193	230	0	34.46	9	0	Lacombe et al. 2013; Laucou et al. 2018; Zuhl-Mihaljevic et al. 2020; D'Onofrio et al. 2021
ZACINAK	D	4550	13400	PAPASKARASI	C	3554	8923	130	0	32.16	9	1	This work
ZUNIC	A	3788	15923	VULPEA	D	3240	13186	220	0	27.14	9	0	This work
* full sibling pair according to cited literature
